# Supplementary material for: The Effect of Information Provision on Public Consensus about Climate Change
Source: PLOS journal article supplement (doi:10.1371/journal.pone.0151469), 2016-04-11
Supplement: S4 (10.1371/journal.pone.0151469.s004) [file journal.pone.0151469.s004]

## S4. Summary Statistics

Table A presents the summary statistics for our study sample and p-values of t tests for differences in means between the treated and control groups. Our baseline treatment groups were well-balanced: respondents in the control or treatment groups did not significantly differ across any of the observable demographic characteristics. We do observe some selection into the follow-up survey: respondents who were older, employed, in the lower and middle income categories, and those with higher education were more likely to respond to the follow-up survey. Respondents in the “other” race category were marginally more likely to follow up.

Table A: Summary Statistics

| Variable:                                   | Average of Group [# Obs in Brackets] |                |                |                | p-value (t test of difference in means) |                    |                        |
|---------------------------------------------|--------------------------------------|----------------|----------------|----------------|-----------------------------------------|--------------------|------------------------|
|                                             | Control                              | HI Treatment   | SI Treatment   | Followed Up    | Control v. All Treated                  | HI v. SI Treatment | Followed Up v. Did Not |
| Age                                         | 46.5<br>[431]                        | 47.6<br>[423]  | 46.9<br>[425]  | 49.2<br>[797]  | 0.456                                   | 0.567              | 0.000***               |
| % Male Respondents                          | 52.0%<br>[433]                       | 52.9%<br>[431] | 56.9%<br>[434] | 55.2%<br>[808] | 0.315                                   | 0.236              | 0.239                  |
| % Asian Respondents                         | 5.8%<br>[433]                        | 3.2%<br>[431]  | 4.4%<br>[434]  | 5.0%<br>[808]  | 0.108                                   | 0.386              | 0.281                  |
| % Black Respondents                         | 5.5%<br>[433]                        | 9.3%<br>[431]  | 6.7%<br>[434]  | 6.3%<br>[808]  | 0.109                                   | 0.159              | 0.126                  |
| % White Respondents                         | 84.8%<br>[433]                       | 84.2%<br>[431] | 86.4%<br>[434] | 86.1%<br>[808] | 0.789                                   | 0.365              | 0.190                  |
| % Other Racial Category                     | 5.5%<br>[433]                        | 5.1%<br>[431]  | 3.2%<br>[434]  | 3.8%<br>[808]  | 0.264                                   | 0.167              | 0.084*                 |
| % Employed                                  | 59.6%<br>[399]                       | 57.5%<br>[402] | 58.4%<br>[406] | 60.8%<br>[760] | 0.567                                   | 0.793              | 0.035**                |
| % Low Income (<\$40,000)                    | 36.6%<br>[432]                       | 36.0%<br>[430] | 32.6%<br>[433] | 31.1%<br>[807] | 0.419                                   | 0.282              | 0.000***               |
| % Mid Income (\$40,000 - \$99,999)          | 49.1%<br>[432]                       | 47.7%<br>[430] | 51.0%<br>[433] | 52.4%<br>[807] | 0.922                                   | 0.323              | 0.004***               |
| % High Income (>\$100,000)                  | 14.4%<br>[432]                       | 16.3%<br>[430] | 16.4%<br>[433] | 16.5%<br>[807] | 0.354                                   | 0.963              | 0.306                  |
| % Conservative                              | 31.7%<br>[432]                       | 33.0%<br>[427] | 28.5%<br>[432] | 32.2%<br>[804] | 0.720                                   | 0.149              | 0.251                  |
| % Liberal                                   | 25.0%<br>[432]                       | 24.1%<br>[427] | 22.0%<br>[432] | 23.3%<br>[804] | 0.437                                   | 0.459              | 0.630                  |
| % High Education (4-year college or higher) | 44.3%<br>[422]                       | 46.0%<br>[417] | 42.0%<br>[421] | 47.0%<br>[790] | 0.925                                   | 0.244              | 0.009***               |
| Trust Scientists Index                      | 2.053<br>[433]                       | 2.028<br>[431] | 1.956<br>[434] | 1.979<br>[808] | 0.405                                   | 0.404              | 0.217                  |
| % High Knowledge (3+ correct)               | 0.524<br>[433]                       | 0.541<br>[431] | 0.509<br>[434] | 0.525<br>[808] | 0.984                                   | 0.356              | 0.993                  |

Notes: Mean values for groups of respondents. Number of observations in a given group for a given demographic category in brackets. p-values and significance levels based on t-tests of differences: \* 10 percent, \*\* 5 percent, \*\*\* 1 percent.
